# Supplementary material for: Mn 2+ -induced structural flexibility enhances the entire catalytic cycle and the cleavage of mismatches in prokaryotic argonaute proteins
Source: Royal Society of Chemistry journal article supplement (doi:10.1039/d3sc06221j), 2024-01-01
Supplement: d3sc06221j1.pdf [file d3sc06221j1.pdf]

Supplementary Information for

**Mn<sup>2+</sup>-Induced Structural Flexibility Enhances the Entire Catalytic Cycle and the Cleavage of Mismatches in Prokaryotic Argonaute Proteins**

Lirong Zheng, Bingxin Zhou, Yu Yang, Bing Zan, Bozita Zhong, Banghao Wu, Yan Feng, Qian Liu, Liang Hong

**This PDF file includes:**

Figures S1-S29

Tables S1-S6

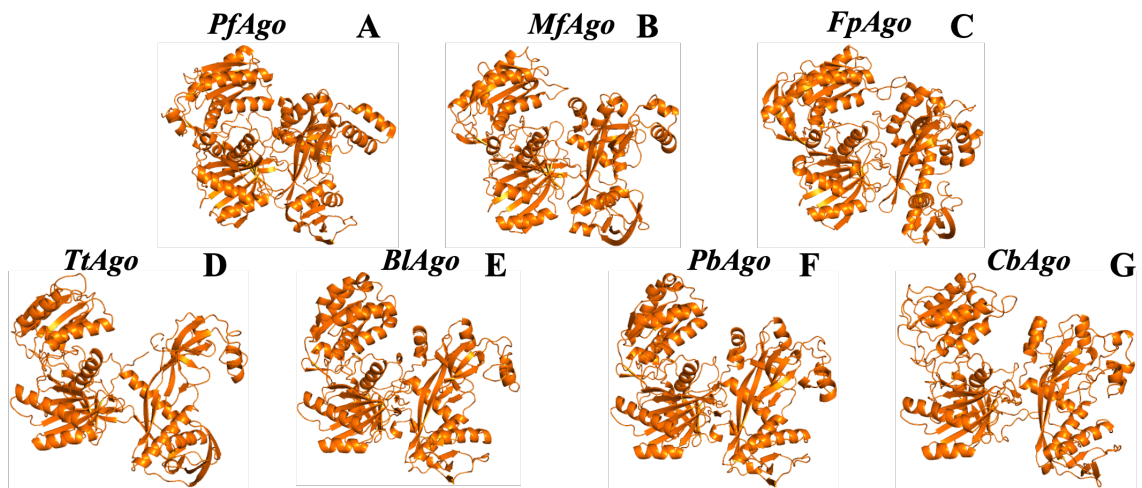

**Fig. S1.** Atomic structure of (A) *PfAgo*, (B) *MfAgo*, (C) *FpAgo*, (D) *TtAgo*, (E) *BlAgo*, (F) *PbAgo*, and (G) *CbAgo*. The atomic structures of *PfAgo*, *TtAgo*, and *CbAgo* are obtained from the crystal structure PDB ID: 1Z25, 4N47, and 6QZK, respectively. The atomic structures of *MfAgo*, *FpAgo*, *BlAgo*, and *PbAgo* are obtained from AlphaFold2.

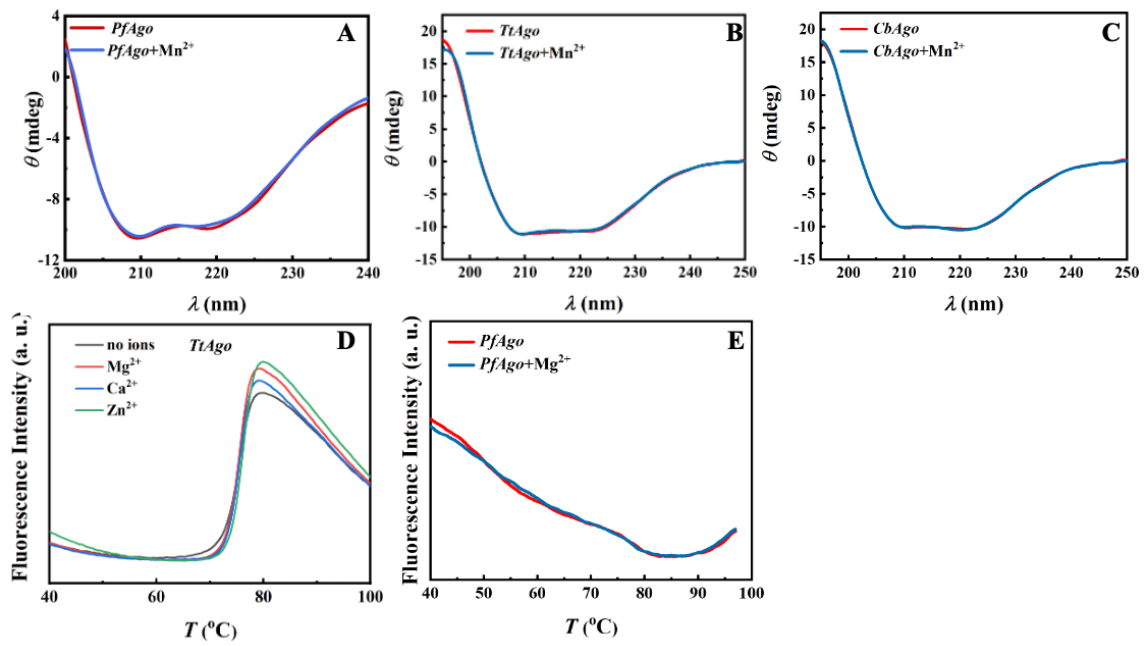

**Fig. S2.** The CD spectra of (A) *PfAgo*, (B) *TtAgo*, and (C) *CbAgo* incubated with and without  $Mn^{2+}$  at their respective physiological temperatures. The DSF of (D) *TtAgo* and (E) *PfAgo* incubated with and without divalent cations.

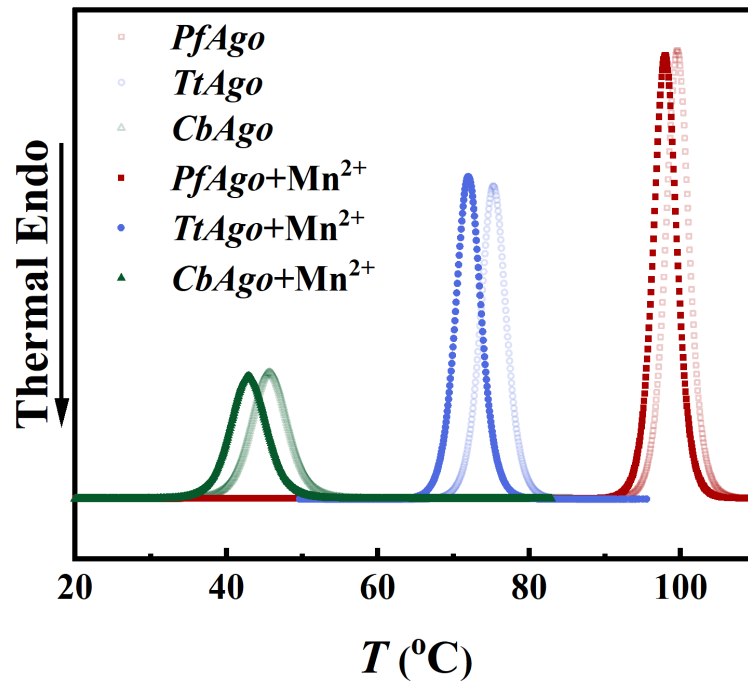

**Fig. S3.** Thermal denature curves of pAgo proteins incubated with and without Mn<sup>2+</sup> determined by nanoDSC.

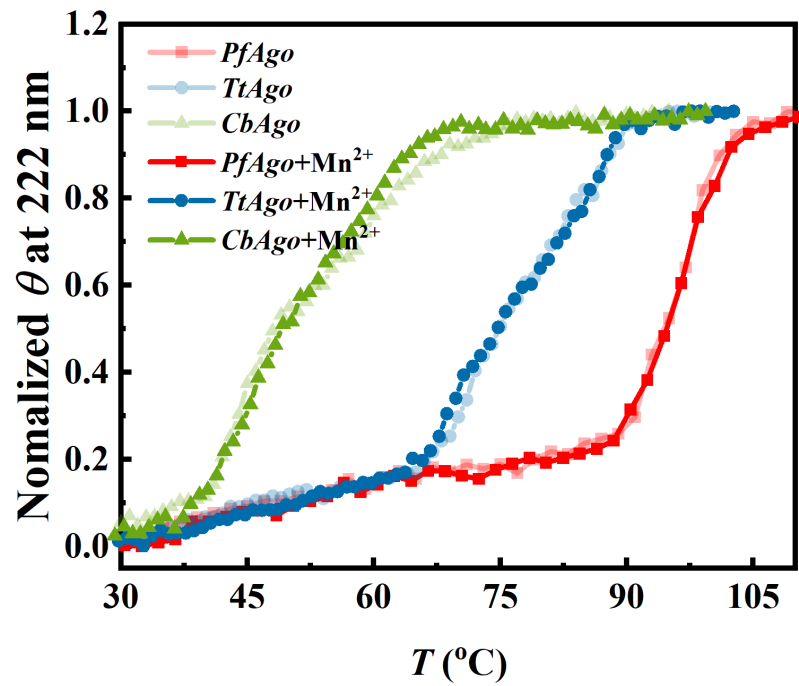

**Fig. S4.** Thermal denature curves of pAgo proteins incubated with and without Mn<sup>2+</sup> determined by CD.

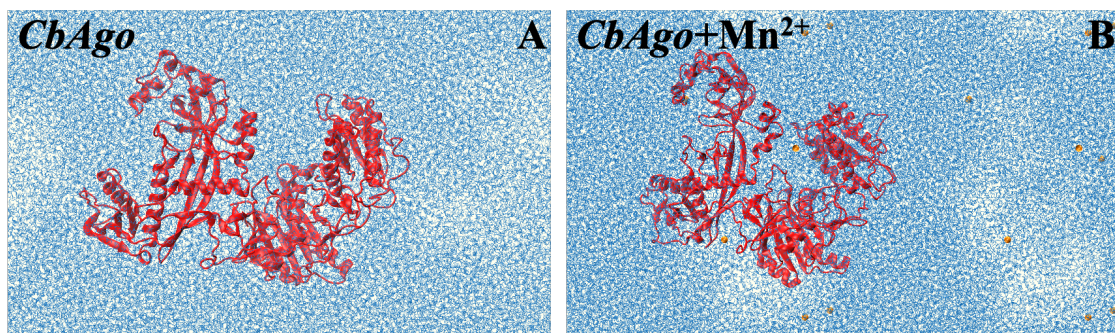

**Fig. S5.** A snapshot of the MD simulation of *CbAgo* incubated (A) without and (B) with  $\text{Mn}^{2+}$  in solution. The golden spheres represent  $\text{Mn}^{2+}$ .

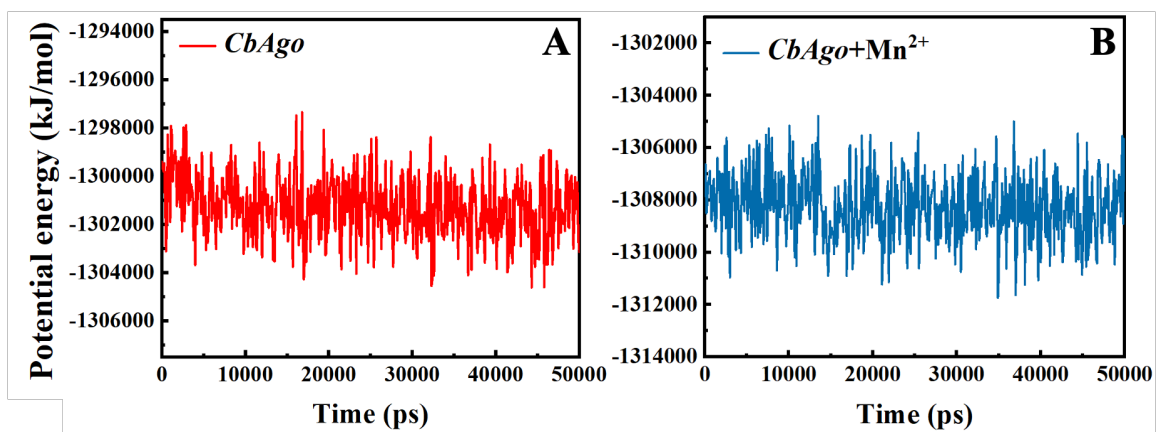

**Fig. S6.** The potential energy of protein as a function of MD simulation time of *CbAgo* incubated (A) without and (B) with  $\text{Mn}^{2+}$ . The simulation time is set as 50 ns.

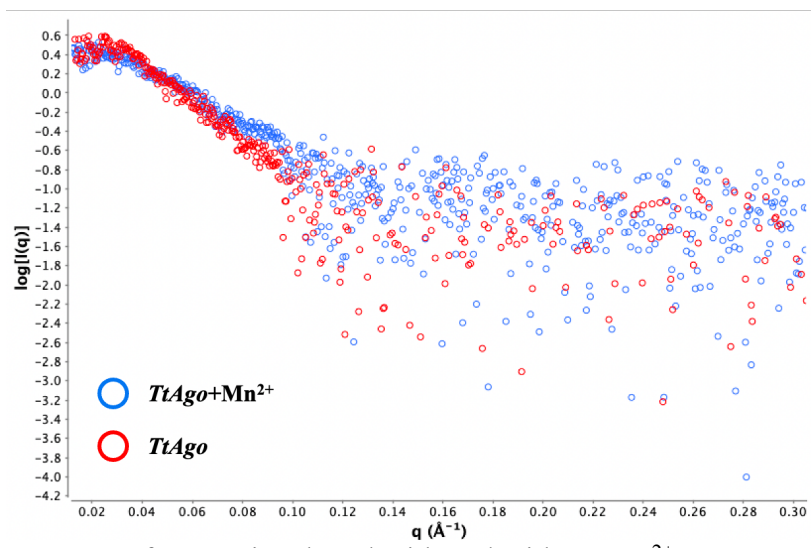

**Fig. S7.** SAXS curves of *TtAgo* incubated with and without  $Mn^{2+}$ .



# *TtAgo*

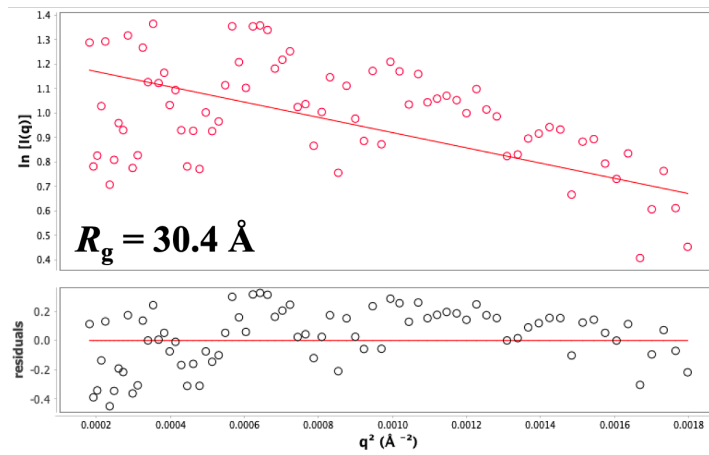

**Fig. S8.** Guinier plots of *TtAgo*. The lower insets show the error-weighted residual difference plots for the Guinier fitting.

# *TtAgo*+Mn<sup>2+</sup>

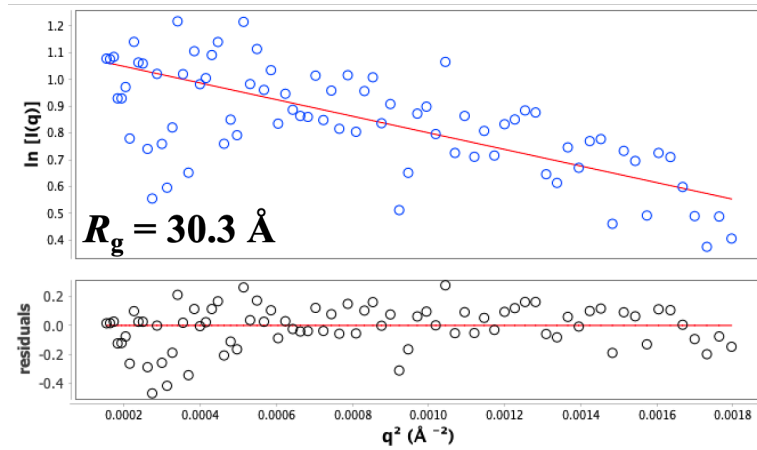

**Fig. S9.** Guinier plots of *TtAgo* incubated with Mn<sup>2+</sup>. The lower insets show the error-weighted residual difference plots for the Guinier fitting.

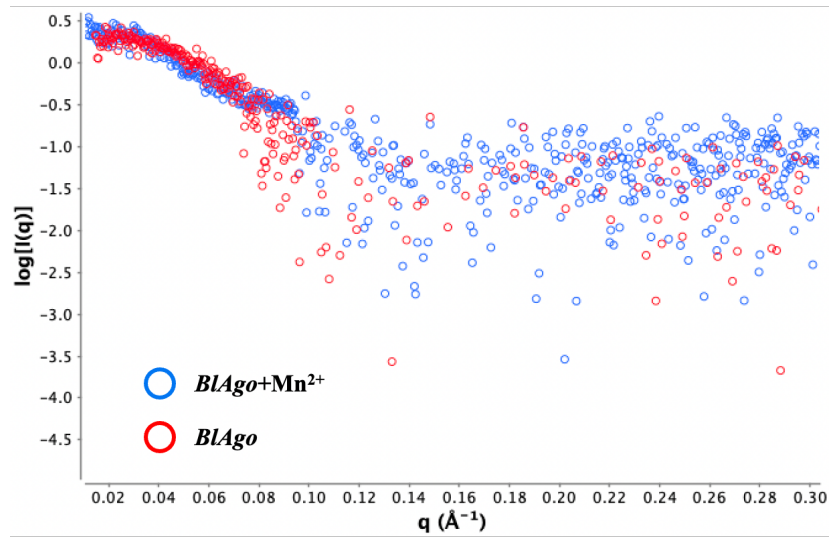

**Fig. S10.** SAXS curves of *BLAGo* incubated with and without  $Mn^{2+}$ .

## *BL*AgO

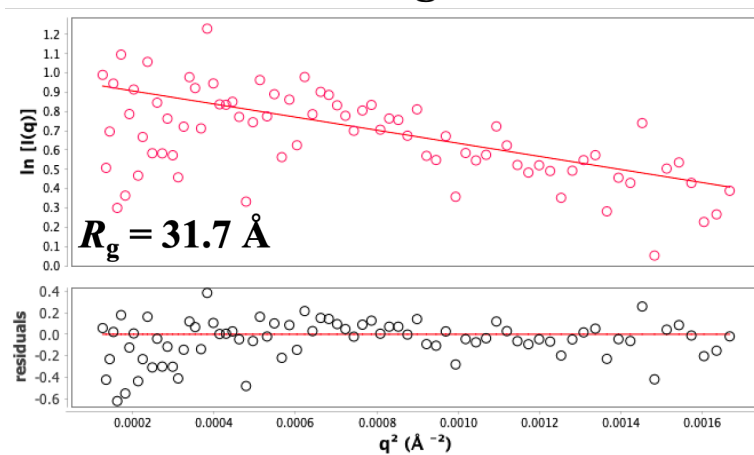

**Fig. S11.** Guinier plots of *BL*AgO. The lower insets show the error-weighted residual difference plots for the Guinier fitting.

# *BlAgo*+Mn<sup>2+</sup>

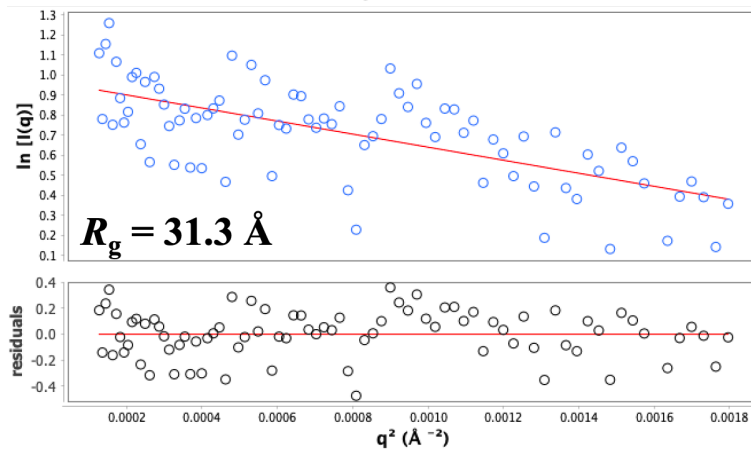

**Fig. S12.** Guinier plots of *BlAgo* incubated with Mn<sup>2+</sup>. The lower insets show the error-weighted residual difference plots for the Guinier fitting.

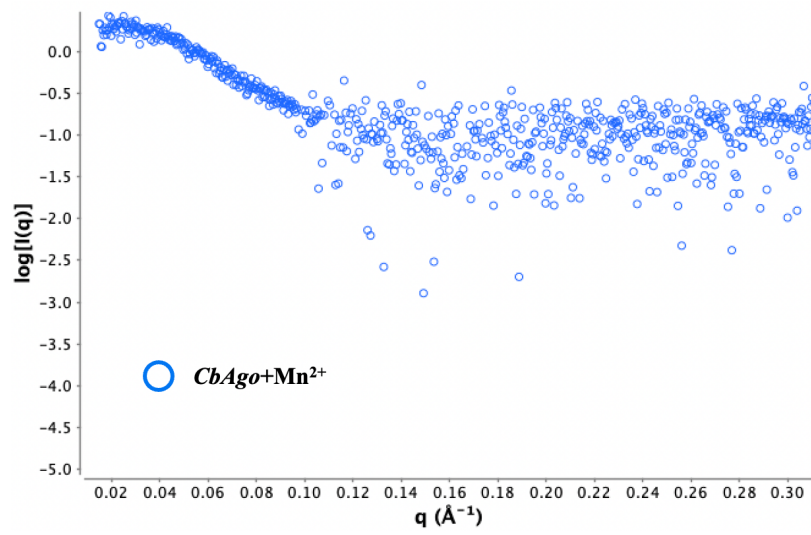

**Fig. S13.** SAXS curve of *CbAgo* incubated with  $Mn^{2+}$ .

# *CbAgo*+Mn<sup>2+</sup>

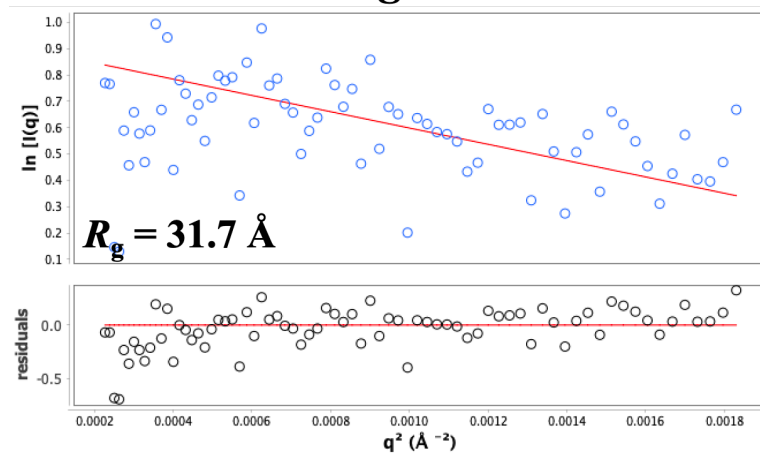

**Fig. S14.** Guinier plots of *CbAgo* incubated with Mn<sup>2+</sup>. The lower insets show the error-weighted residual difference plots for the Guinier fitting.

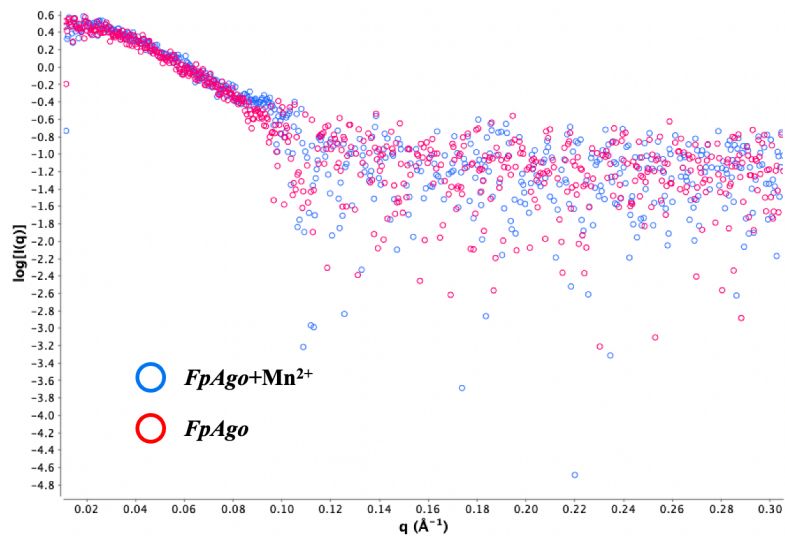

**Fig. S15.** SAXS curves of *FpAgo* incubated with and without  $Mn^{2+}$ .



## *FpAgo*

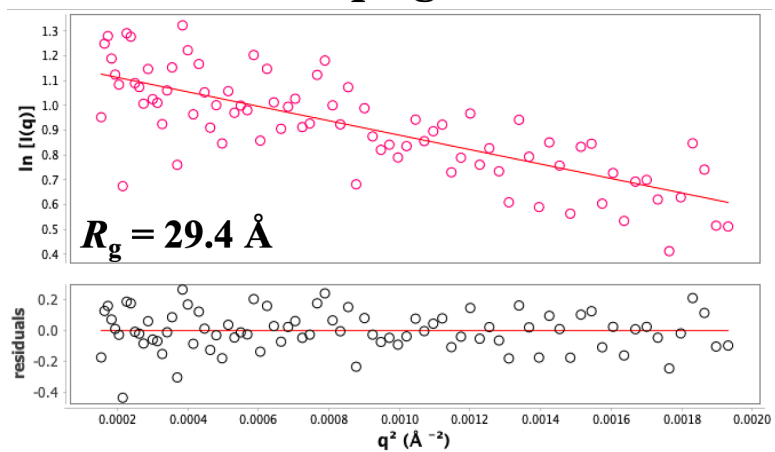

**Fig. S16.** Guinier plots of *FpAgo*. The lower insets show the error-weighted residual difference plots for the Guinier fitting.

# *FpAgo*+Mn<sup>2+</sup>

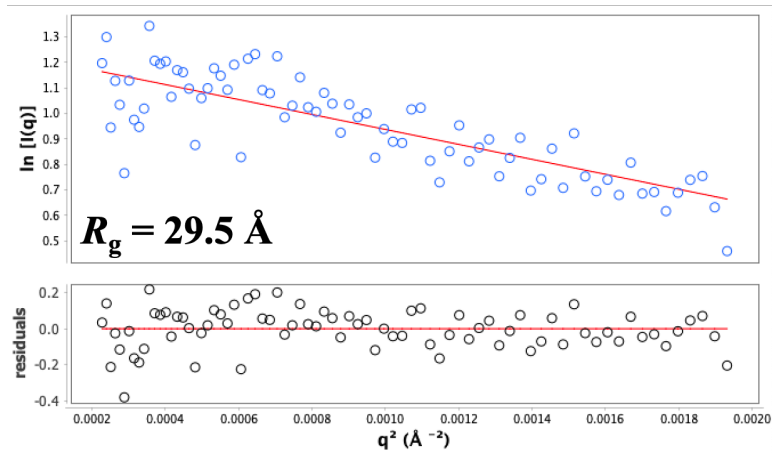

**Fig. S17.** Guinier plots of *FpAgo* incubated with Mn<sup>2+</sup>. The lower insets show the error-weighted residual difference plots for the Guinier fitting.

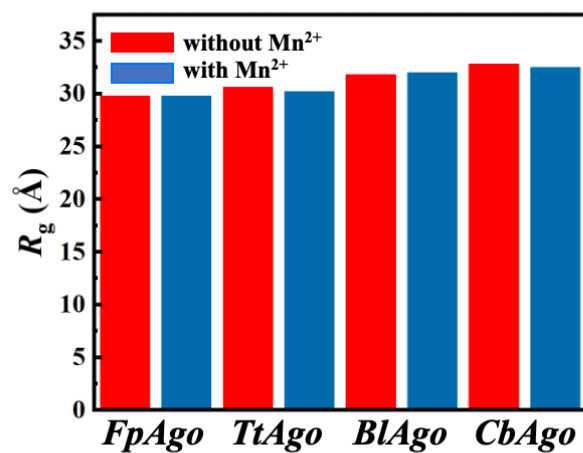

**Fig. S18.** The radius of gyration ( $R_g$ ) of *FpAgo*, *TtAgo*, *BLAgo*, and *CbAgo* incubated with and without  $\text{Mn}^{2+}$  derived from MD simulations.

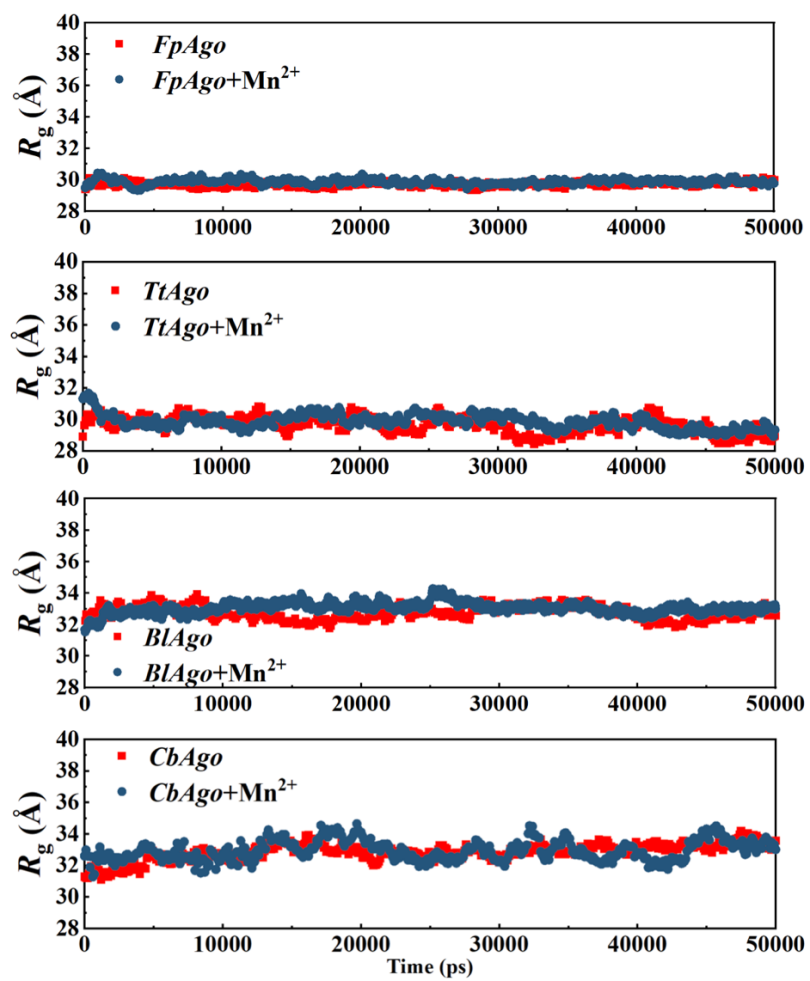

**Fig. S19.**  $R_g$  of pAgo proteins incubated with and without  $Mn^{2+}$  as a function of MD simulation time.

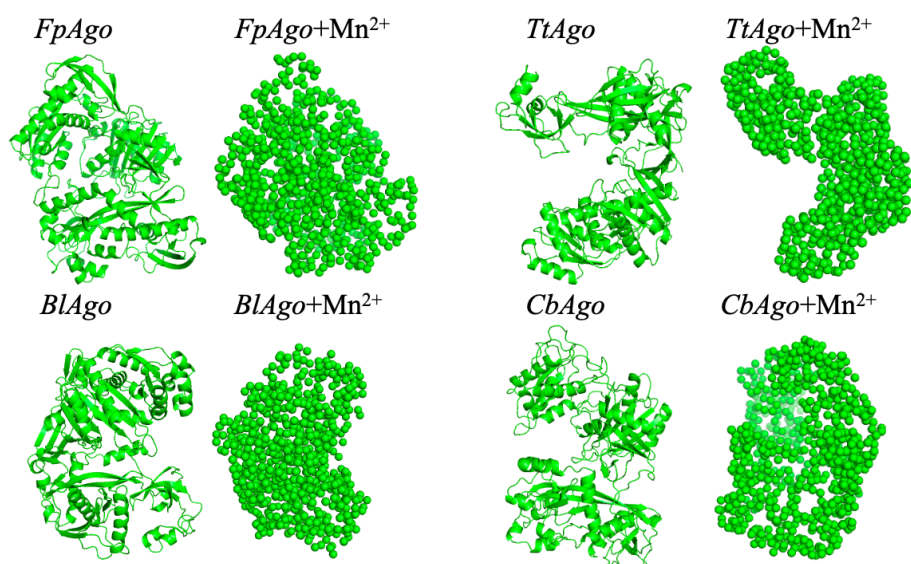

**Fig. S20.** The *ab initio* structures of (A) *FpAgo*, (B) *TtAgo*, (C) *BlAgo*, and (D) *CbAgo*.

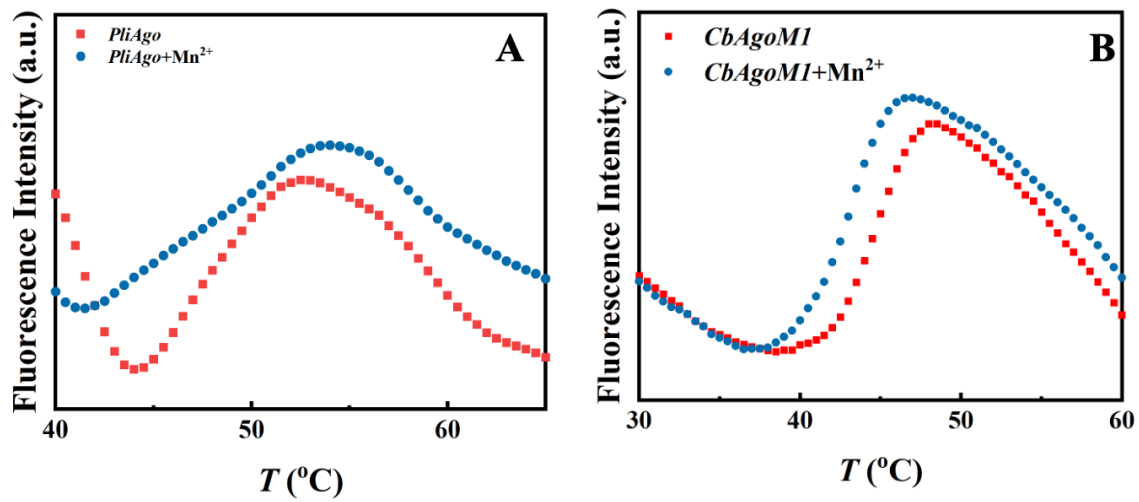

Fig. S21. DSF measurements of (A) *PliAgo* and (B) *CbAgoM1*.

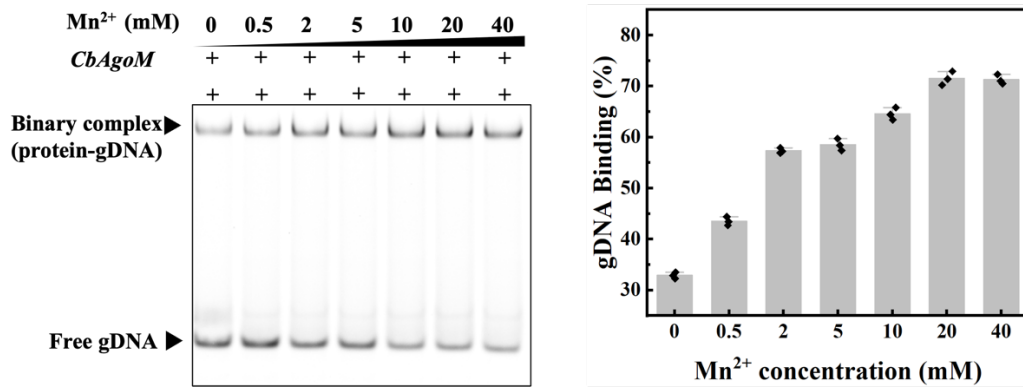

**Fig. S22.** Electrophoresis mobility shift assay of the binding of pAgo protein to gDNA at different concentrations of  $Mn^{2+}$ . Left panel: binding assay with gDNA at different concentrations of  $Mn^{2+}$ . Right panel: quantifying the effect of incubating with  $Mn^{2+}$  on gDNA binding activity by EMSA.

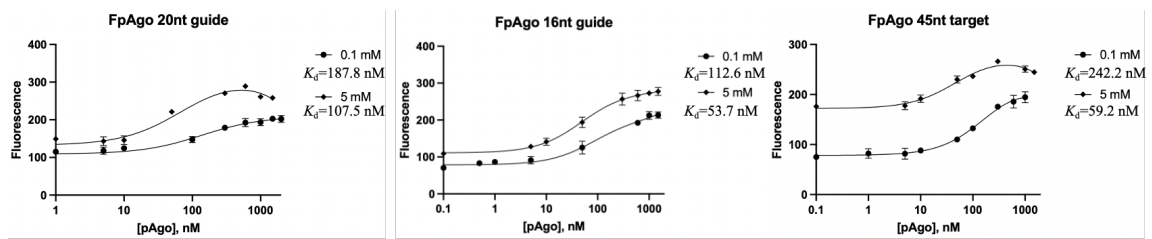

**Fig. S23.** Fluorescence polarization assay of the tDNA and gDNA of varying lengths at different concentrations of  $Mn^{2+}$ . The results from three independent experiments were quantified. Error bars represent the standard deviations of three independent experiments.



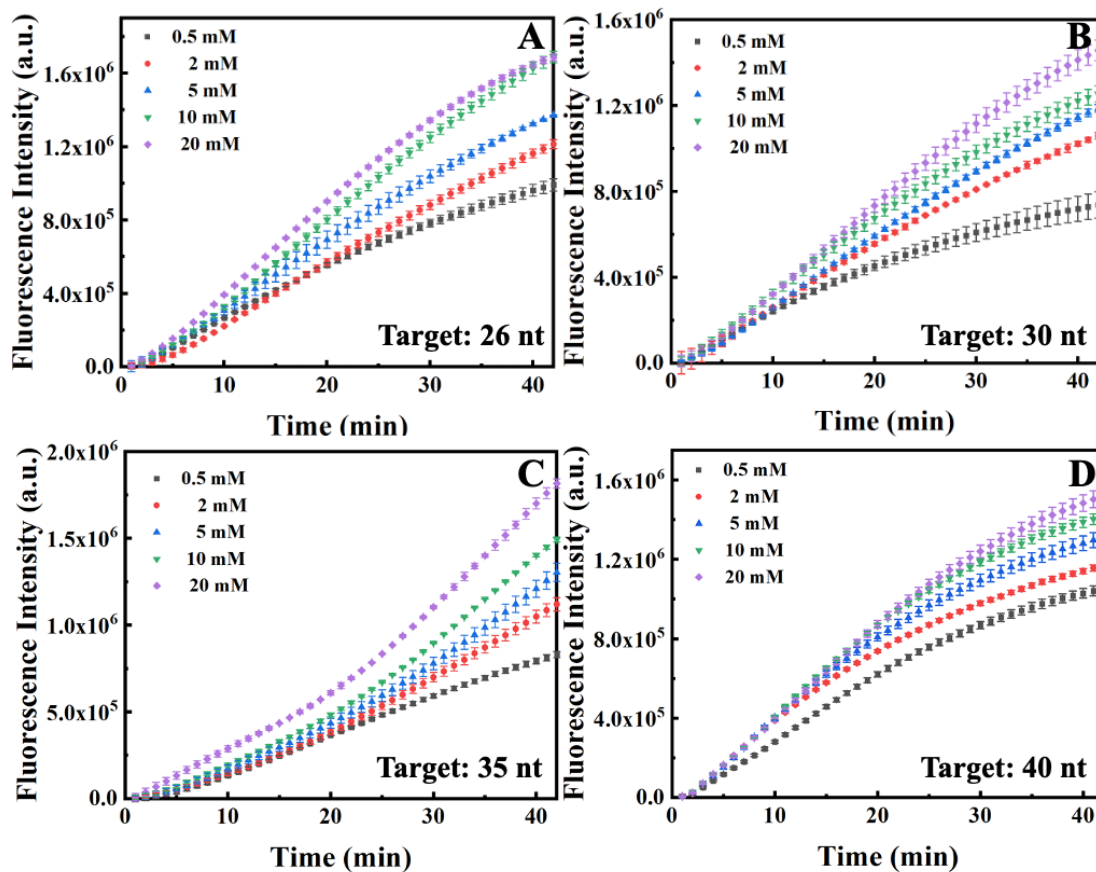

**Fig. S24.** The role of the Mn<sup>2+</sup>-dependent structural dynamics of pAgo proteins for cleavage target DNA of varying length. Cleavage assays with gDNA and tDNA of varying lengths at different concentrations of Mn<sup>2+</sup>. *PliAgo* preloaded with 21 nt gDNA cleaves (A) 26 nt, (B) 30 nt, (C) 35 nt, and (D) 40 nt tDNA. In all experiments, protein, guide, and target were mixed at a 5:1:1 molar ratio and incubated at 37 °C. The reaction buffer without Mn<sup>2+</sup> contains 10 mM EDTA. Three samples were used for each experimental condition. The results from three independent experiments were quantified. Error bars represent the standard deviations of three independent experiments. The detailed procedure is presented in the Materials and Methods. The nucleotide sequences of the gDNA and tDNA are presented in Table S4.

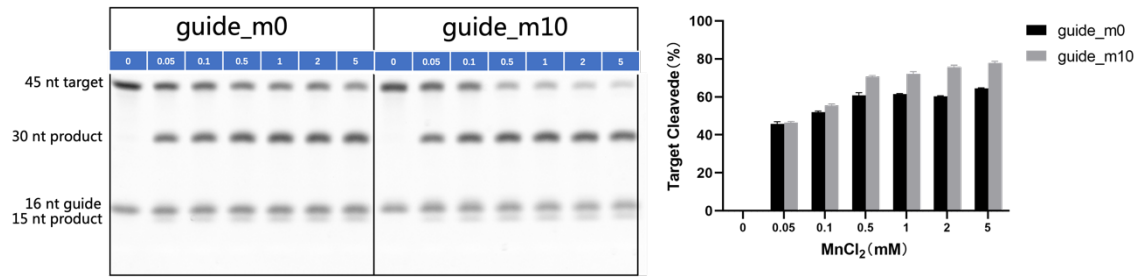

**Fig. S25.** Left panel: Gel detection results for the designed mismatched gDNA-directed cleavage on tDNA at different concentrations of Mn<sup>2+</sup>. Quantifying the effects of incubating with Mn<sup>2+</sup> on tDNA cleavage obtained from the left panel. *CbAgo* is used here. The results from three independent experiments were quantified. Error bars represent the standard deviations of three independent experiments.

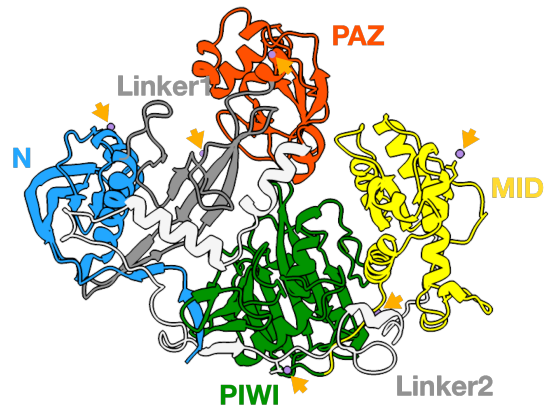

**Fig. S26.** Locations of Mn<sup>2+</sup> on protein are obtained from MD simulations. The purple spheres represent Mn<sup>2+</sup>.

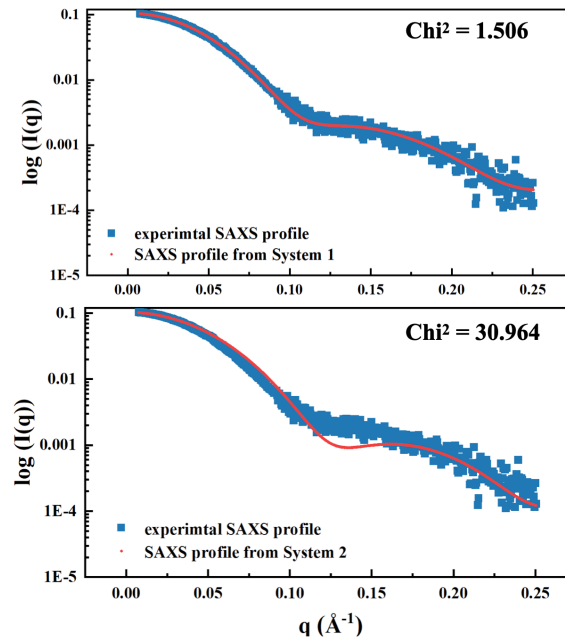

**Fig. S27.** Comparison between the experimental SAXS profile of *CbAgo* incubated with  $\text{Mn}^{2+}$  (blue dots) and the scattering profile (red lines) obtained from (upper panel) System 1 and (lower panel) System 2.

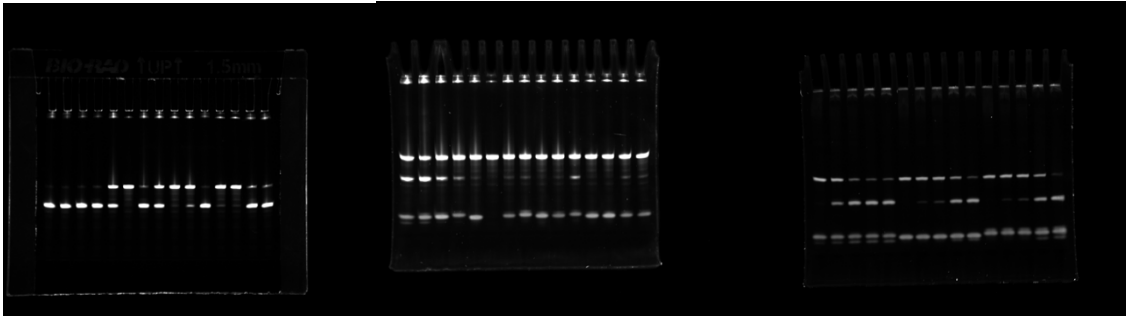

**Fig. S28.** Left panel: raw image of Fig. 4B (upper panel). Middle panel: raw image of Fig. 4B (lower panel). Right panel: raw image of Fig. 4C (lower panel).

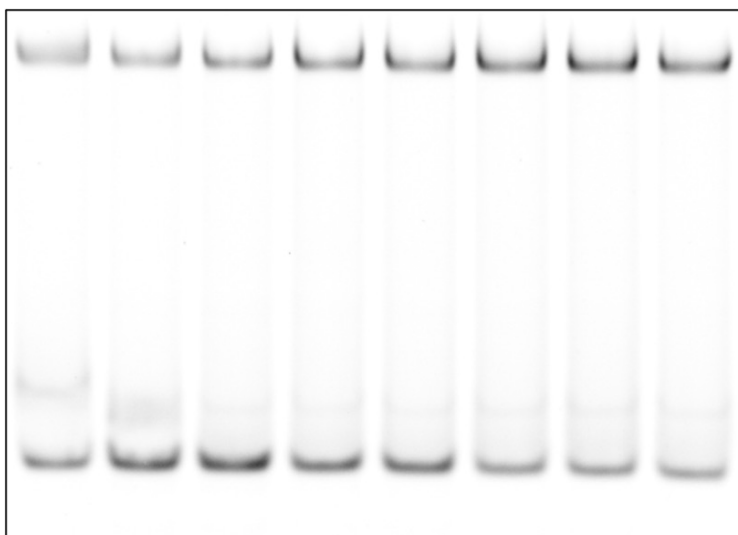

**Fig. S29.** Raw image of Fig. S22.

**Table S1.** The relative contents of different secondary structures in pAgo proteins derived from MD simulations, as defined by mass fraction.

| <b>Protein</b>                 | <b>Alpha-helix (%)</b> | <b>Beta-sheet (%)</b> | <b>Turn and loops (%)</b> |
|--------------------------------|------------------------|-----------------------|---------------------------|
| <i>CbAgo</i> +Mn <sup>2+</sup> | 29                     | 25                    | 46                        |
| <i>CbAgo</i>                   | 29                     | 25                    | 46                        |
| <i>TtAgo</i> +Mn <sup>2+</sup> | 31                     | 31                    | 38                        |
| <i>TtAgo</i>                   | 31                     | 31                    | 38                        |
| <i>FpAgo</i> +Mn <sup>2+</sup> | 33                     | 28                    | 39                        |
| <i>FpAgo</i>                   | 33                     | 28                    | 39                        |
| <i>BlAgo</i> +Mn <sup>2+</sup> | 30                     | 27                    | 43                        |
| <i>BlAgo</i>                   | 30                     | 27                    | 43                        |

**Table S2.**  $M_w$  of *CbAgo*, *TtAgo*, *BlAgo*, and *FpAgo* estimated from SAXS.  $M_w^{\text{expected}}$  is obtained from the amino acid sequence.

| Protein                        | $M_w^{\text{experimental}}$ (kDa) | $M_w^{\text{expected}}$ (kDa) |
|--------------------------------|-----------------------------------|-------------------------------|
| <i>CbAgo</i>                   | 91                                | 86                            |
| <i>CbAgo</i> +Mn <sup>2+</sup> | 88                                |                               |
| <i>TtAgo</i>                   | 78                                | 77                            |
| <i>TtAgo</i> +Mn <sup>2+</sup> | 79                                |                               |
| <i>BlAgo</i>                   | 72                                | 80                            |
| <i>BlAgo</i> +Mn <sup>2+</sup> | 78                                |                               |
| <i>FpAgo</i>                   | 90                                | 83                            |
| <i>FpAgo</i> +Mn <sup>2+</sup> | 84                                |                               |



**Table S3.** SAXS data collection and analysis.

|                                          | <i>FpAgo</i>   | <i>FpAgo</i> +<br>Mn <sup>2+</sup> | <i>TtAgo</i>   | <i>TtAgo</i> +<br>Mn <sup>2+</sup> | <i>CbAgo</i>   | <i>CbAgo</i> +<br>Mn <sup>2+</sup> | <i>BLAgo</i>   | <i>BLAgo</i> +<br>Mn <sup>2+</sup> |
|------------------------------------------|----------------|------------------------------------|----------------|------------------------------------|----------------|------------------------------------|----------------|------------------------------------|
| <b>Data acquisition</b>                  |                |                                    |                |                                    |                |                                    |                |                                    |
| Beamline facility                        | BL19U2-SSRF    |                                    | BL19U2-SSRF    |                                    | BL19U2-SSRF    |                                    | BL19U2-SSRF    |                                    |
| Wavelength (nm)                          | 0.103          |                                    | 0.103          |                                    | 0.103          |                                    | 0.103          |                                    |
| Sample-to-detector distance (m)          | 3              |                                    | 3              |                                    | 3              |                                    | 3              |                                    |
| Detector                                 | Pilatus 2M     |                                    | Pilatus 2M     |                                    | Pilatus 2M     |                                    | Pilatus 2M     |                                    |
| <b>Overall parameter</b>                 |                |                                    |                |                                    |                |                                    |                |                                    |
| $R_g$ (Å) (from P(r))                    | 2.95           | 2.95                               | 3.0            | 3.1                                | 3.20           | 3.20                               | 3.14           | 3.17                               |
| $R_g$ (Å) (from Guinier)                 | 2.94           | 2.95                               | 3.04           | 3.03                               | 3.20           | 3.17                               | 3.17           | 3.13                               |
| Porod volume estimate (nm <sup>3</sup> ) | 148            | 150                                | 122            | 121                                | 185            | 188                                | 195            | 192                                |
| Oligomeric state                         | monomer        |                                    | monomer        |                                    | monomer        |                                    | monomer        |                                    |
| <b>Software</b>                          |                |                                    |                |                                    |                |                                    |                |                                    |
| SAXS data integration                    | <i>ScÅtter</i> |                                    | <i>ScÅtter</i> |                                    | <i>ScÅtter</i> |                                    | <i>ScÅtter</i> |                                    |
| Ab initio modeling                       | GASBOR         |                                    | GASBOR         |                                    | GASBOR         |                                    | GASBOR         |                                    |
| Simulated SAXS                           | CRY SOL        |                                    | CRY SOL        |                                    | CRY SOL        |                                    | CRY SOL        |                                    |

**Table S4.** List of nucleic acid sequences for binding and cleavage assay used in this study

| Oligonucleotide name | Sequence (5'-3')                                         | Description                |
|----------------------|----------------------------------------------------------|----------------------------|
| gDNA 21 nt           | 5'P-TGAGGTAGTAGGTTGTATAGT                                |                            |
| tDNA 26 nt           | 5'FAM-ATATACTATACAACCTACTACCTCGT-3'BHQ1                  | 5'FAM labeled tDNA, 3'BHQ1 |
| tDNA 30 nt           | 5'FAM-ATATACTATACAACCTACTACCTCGTATAA-3'BHQ1              | 5'FAM labeled tDNA, 3'BHQ1 |
| tDNA 35 nt           | 5'FAM-ATATACTATACAACCTACTACCTCGTATAAATTTT-3'BHQ1         | 5'FAM labeled tDNA, 3'BHQ1 |
| tDNA 40 nt           | 5'FAM-ATATACTATACAACCTACTACCTCGTATAAATTTTAAAT-3'BHQ1     | 5'FAM labeled tDNA, 3'BHQ1 |
| tDNA 45 nt           | 5'FAM-ATATACTATACAACCTACTACCTCGTATAAATTTTAAATAAAT-3'BHQ1 | 5'FAM labeled tDNA, 3'BHQ1 |

**Table S5.** List of amino acid sequences of pAgo proteins used in this study

| pAgo proteins | Sequence                                                                                                                                                                                                                                                                                                                                                                                                                                                                                                                                                                                                                                                                                                                                                                                                                                                                            | Description |
|---------------|-------------------------------------------------------------------------------------------------------------------------------------------------------------------------------------------------------------------------------------------------------------------------------------------------------------------------------------------------------------------------------------------------------------------------------------------------------------------------------------------------------------------------------------------------------------------------------------------------------------------------------------------------------------------------------------------------------------------------------------------------------------------------------------------------------------------------------------------------------------------------------------|-------------|
| <i>CbAgo</i>  | <p>MANNLTFEAFEGIGQLNELNFYKYRLIGKGGQIDNVHQAIWSVK<br/> YKLQANNFFKPVFVKGEILYSLDELKVIPEFENVEVILDGNIILSI<br/> SENTDIYKDVIVFYINNALKNIKDITNYRKYITKNTDEIICKSILTT<br/> NLKYQYMKSEKGFKLQRKFKISPVVFRNGKVILYLNCSSDFSTD<br/> KSIYEMLNDGLGVVGLQVKNKWTNANGNIFIEKVDNTISDPG<br/> TSGKLGQSLIDYYINGNOKYRVEKFTDEDKNAKVIQAKIKNKT<br/> YNYIPQALTPVITREYLSHTDKKFSKQIENVIKMDMNYRYQTLK<br/> SFVEDIGVIKELNNLHFKNQYYTNFDFMGFESGVLEEPVLMGA<br/> NGKIKDKKQIFINGFFKNPKENVKFGVLYPEGCMENAQSIARSIL<br/> DFATAGKYNKQENKYISKNLNMNIGFKPSECIFESYKLGDITEYKA<br/> TARKLKEHEKVGAVIAVIPDMNELEVENPYNPFKKVWAKLNIPS<br/> QMITLKTTEKFNIVDKSGLYYLHNIALNILGKIGGIPWIKDMP<br/> GNIDCFIGLAVGTREKGIHFPACSVLFDKYGKLINYYKPTIPQSG<br/> EKIAETILQEIFDNVLISYKEENGEYPKNIVIHRAFGSRENIDWYK<br/> EYFDKKGKIFNIIIEVKKNIPVKIAKVVGSNICNPIKGSYVLKNDK<br/> AFIVTTDIKDGVASPNPLKIEKTYGDVEMKSILEQIYSLSQIHVGS<br/> TKSLRLPITTYADKICKAIEYIPQGVVDNRLFFL</p> | Wild type   |
| <i>CbAgoM</i> | <p>MNNLTFEAFEGIGQLNELNFYKYRLIGKGGQIDNVHQAIWSVKY<br/> KLQANNFFKPVFVKGEILYSLDELKVIPEFENVEVILDGNIILSIS<br/> ENTDIYKDVIVFYINNALKNIKDITNYRKYITKNTDEIICKSILTT<br/> NLKYQYMKSEKGFKLQRKFKISPVVFRNGKVILYLNCSSDFSTD<br/> KSIYEMLNDGLGVVGLQVKNKWTNANGNIFIEKVDNTISDPG<br/> TSGKLGQSLIDYYINGNOKYRVEKFTDEDKNAKVIQAKIKNKT<br/> YNYIPQALTPVITREYLSHTDKKFSKQIENVIKMDMNYRYQTLK<br/> SFVEDIGVIKELNNLHFKNQYYTNFDFMGFESGVLEEPVLMGA<br/> NGKIKDKKQIFINGFFKNPKENVKFGVLYPEGCMENAQSIARSIL<br/> DFATAGKYNKQENKYISKNLNMNIGFKPSECIFESYKLGDITEYKA<br/> TARKLKEHEKVGAVIAVIPRMNELEVENANPFCKVWAKLNIPS<br/> QMIHLKSTEFKFNIVDKSGLYYLHNIALNILGGIGGIPWIKDMP<br/> GNIDCFIGLDVGTREKGIHFPACSVLFDKYGKLINYYKPTIPQSG<br/> EKIAETILQEIFDNVLISYKEENGEYPKNIVIHVDGFSRENIDWYK<br/> EYFDKKGKIFNIIIEVKKNIPVKIAKVVGSNICNPIKGSYVLKNDK<br/> AFIVTTDIKDGVASPNPLKIEKTYGDVEMKSILEQIYSLSQIHVGS<br/> TKSLRLPITTYADKICKAIEYI</p>              | Mutant      |
| <i>PbAgo</i>  | <p>MNTPLTHYVLTEWESDTNTNVLHIHLYTLPVRNVFEQHKENG<br/> ACFDLRKLNRSLLIDFYDQYIVSWQPIENWGEYTFQHEYRSINP<br/> TILAEAILERLLLRTIESVQPKKEIAAGSRKFTWLKAEKVVENI<br/> SIHRVIQCDVTVDYAGKISVGFDLNHSYRTNESVYDLMKNSAIF<br/> KGDRVIDIYNLHVEFVEISNSTINDSIPELNQSVMNYFTKERKQ<br/> AWKVDKLEQSMVVYLKAFNGSRIAYAPAMLQKELTFESLPTN<br/> VVRQTSEIFKQANQKIKTLLDEIQKILARTDKIKFNKQKLLVQ<br/> QAGYEILELSNPNLQFGKNVTQTQLKYGLDKGGVVASKPLSINL<br/> LVPELIDTKLDVINDFNDKLNALSHKWGVPLSILKKSAYRNR<br/> PIDFTNPHQLAILLKELTKNLFQELTLVIPEKISGMWYDLVKKEF<br/> GGNSSVPTQFITIETLQKANDYILGNLLGLYSKSGIQPWILNSPL<br/> SSDCFIGLDVSHEAGRSTGIVQVVGKDGRLSSKANTSNEAGE<br/> KIRHETMCQIVYSAIDQYQQHYNERPKHVTFHRDGFCDRELLS<br/> LDEVMSLDVQYDMVEIHKTNRRMALTVGKQGWETKPGLCY<br/> LKDESAYLIATNPHPRVGTAPIKIHKKGLPIEAIQDIYHLSFM<br/> HIGSLLKCRLPITTYADLSSTFFNRQWLPIDSGEALHFV</p>                                                                     | Wild type   |
| <i>PliAgo</i> | <p>MTLETTLPLEGLEGLTASYQLYAVKGLSGLDETEYHKNVNLV<br/> RRLSFSMKAPFVALSRDGEQFIAPPNYVTEFPVDHRVVRAMVK<br/> LVPTGEPLNLRFDAADDEYDGLRLRYLDFVLQQPLFANHHLWQ<br/> PGSGQPFFHKKPLKRLDDVDLYDGVSVRAAKHPEGGFIVCDA<br/> RSKFITHTPIGARADRKRLGKLINRSCLYKMGDHWYQFRIDAVS<br/> DWKVGEPSPFEGNVPISLAQQLVRTAGNAAPKSIIDLPEGGAL<br/> EYFTSTNERMAPAELCFLIEDTHGRRAAKLQRQTILSPSERRAR</p>                                                                                                                                                                                                                                                                                                                                                                                                                                                                                                                            | Wild type   |

|              |                                                                                                                                                                                                                                                                                                                                                                                                                                                                                                                                                                                                                                                                                                                                                                                                                                                   |           |
|--------------|---------------------------------------------------------------------------------------------------------------------------------------------------------------------------------------------------------------------------------------------------------------------------------------------------------------------------------------------------------------------------------------------------------------------------------------------------------------------------------------------------------------------------------------------------------------------------------------------------------------------------------------------------------------------------------------------------------------------------------------------------------------------------------------------------------------------------------------------------|-----------|
|              | VNGFIRRYLSELNIGGAKLSAGARAHAFFTETHMPPALSFGNGT<br>VLAPDTSKDRFQAMQEYSSMRRTMMLDKKVGFFHQDVFPPT<br>LLLPEVVKKSWGPAFASDFVGTVQELYPAGGYRPEIIEYRDKAY<br>GGGVPGQMKALLEVAERGEIKSGDVLVMLHRINGAPRAQDKL<br>AAMVCNEFEKRFGRVQVIHSDSPGRGYKRIFKNDKPTYVQQR<br>GRGVNIKGYLKGAAALNKVCLGNSRWPVFLRDPLNADVTIGIDV<br>KNNMAVFTMVAEGGRIVRVQRSRSRQREQLLESQVTQVITEML<br>SKELPEIKKQVQRVVIHRDGRAWPAEIAGARKTFADMAESGLIA<br>VDADVSVEVLKSSPAPLRLFSFEEPTQENPKGVINPVLGSWLK<br>LSENDGYICTTGAPLLLQGTADPLHVRKAFGPMAIEDALKDVF<br>DLSCLTWPKPDSMRLPLTIKLCIALFDAAEYDVDVVRFAD<br>GNTGEASA                                                                                                                                                                                                                                                                                                        |           |
| <i>BlAgo</i> | MNDFQVLTEWTLDRATEFIIHIYTMPINDLNKSHTESYELVKT<br>RRLNNTKEIVFYEQQIAALTKVENWGHYTRGDYQHRCIKLSVP<br>RERELLQRLLLKVVGARQPKKVYAEGGLFINASPQYKIENINIH<br>EALNLDVSVTQEGLIIVGDFDFTHKLYYKDTLLEFVKRNQIQKGD<br>RVIDPIYHISYVYDEVAPYTVSESSPYLGQSILQYYKNKDWILKK<br>LNTDMSVHVHRNKENKIFPYAPVFLKKECSLSSLDQRIVTKINR<br>VIKLGPNKMTKSIREVQNILSRFEVLRNKNLLVSNQGYKIK<br>YFPVPSLRFKGNVTSKSLKNGLIKGGVVDPRNLELAYFIDPVIK<br>NNTESIEVFMKNLEEKSKQLGVPLQRLKKGRSFYNQLDTQMFS<br>SPNELVLGLKKAKEFNCLTVVITTTQONIDKCYGAIKKEFGGNY<br>DIPTQFVTADTAKEKNDYILLNILLGIYAKASIQSWILKEPLHSDC<br>FIGLDVSHEENRHSTGLVQVVGKDGRLVSSKAMSTIESGERIRD<br>ETMKEIVYEAHSYENQYGYRPHVTFHRDGFRENIDNIEYIL<br>KNLGVLFDYVEVIKSNRRMANFLSKEEGWKTEIGASYLKDDL<br>AYLCSTAPGKQVGMaipVKITQVTGHLTMSAIVSDIFNLSHMHV<br>GSLIKSRLPISTYYADLSSTFFNRGWISSRSNGLQFV                                                                    | Wild type |
| <i>TtAgo</i> | MNHLGKTEVFLNRFALRPLNPEELRPWRLEVVLDPGGREEVY<br>PLLAQVARRAGGVTVRMGDGLASWSPPEVLVLEGLTARMGQT<br>YAYRLYPKGRRLDPKDPGERSVLSALARLLQERLRRLEGVW<br>VEGLAVYRREHARGPGWRVLGGAVLDLWVSDSGAFLEVDPA<br>YRILCEMSLEAWLAQGHPLPKRVRNAYDRRTWELLRLGEEDPK<br>ELPLPGGLSLLDYHASKGRLQREGGRVAVADPKDPRKPIPHL<br>TGLLVPVLTLEDLHEEEGSLALSPLWEERRRRRTREIASWIGRRLG<br>LGTPEAVRAQAYRLSIPKLMGRRAVSKPADALRVGFYRAQETAL<br>ALLRLDGAQGWPEFLRRALLRAFGASGASLRLHTLHAHPSQGL<br>AFREALRKAKEEGVQAVLVLTPMAWEDRNRLKALLLREGLPS<br>QILNVPLREEERHRWENALLGLLAKAGLQVVALSGAYPAELAV<br>GFDAGGRESFRFGAACAVGGDGGHLLWTLPEAQAGERIPQEV<br>VWDLLEETLWAFRRKAGRLPSRVLLLRDGRVPQDEFALALEAL<br>AREGIAYDLVSVRKS GGGRVYPVQGRADGLYVPLEDKTFLLLT<br>VHRDFRGTPrPLKLVHEAGDTPLEALAHQIFHLTRLYPASGFAP<br>RLPAPLHLADRLVKEVGRLGIRHLKEVDREKLFFV                                                                                 | Wild type |
| <i>PfAgo</i> | MKAKVVINLVKINKKIIPDKIYVYRLFNDPEEELQKEGYSIYRLA<br>YENVGIVIDPENLIIATTKLEYEGEPIEPEGEISFSELNDYQSKLV<br>LRLKENGIGEYELSKLLRKRFRKPKTFGDYKVIPVEMSVIKHD<br>EDFYLVIIHQIQSMKTLWELVNKDPKELEEFMTHKENLMLK<br>DIASPLKTVYKPCFEEYTKKPKLDHNQEIVKYWYNYHIERYWN<br>TPEAKLEFYRKFGQVDLKQPAILAKFASKIKKNKNYKIYLLPQL<br>VVPTYNAEQLESVAKIELEYTKLMPEERKELLENILAEVDSII<br>DKSLSEIEVEKIAQELNKRVRDDKGNVSPISQLNVQKSQLLL<br>WTNYSRKYPVILPYEVPEKFRKIREIPMFIILDSGLLADIQNFATN<br>EFRELKSMYYSLAKKYNLAKKARSTNEIGLPFLDFRGKEKVI<br>TEDLNSDKGIIIEVVEQVSSFMKGKELGLAFIAARNKLSSEKFEI<br>KRRLFNLVISQVVNEDTLKNKRDKYDRNRLDLFVRHNLLFQV<br>LSKLGVKYVLDYRFNYDYIIGIDVAPMKRSEGYIGGSAMVFD<br>QGYIRKIVPIKIGEGESVDMNEFFKEMVDKFEFNIKLDNKK<br>ILLRDGRITNNEEGLKYISEMFDIEVVTMDVIKNHPVRAFAN<br>MKMYFNLGGAIYLIPHKLKQAKGTPPIKLAKKRIKNGKVEKQ<br>SITRQDVLDFILTRLNYGSISADMRLPAPVHYAHKFANAIIRNEW<br>KIKEEFLAEGFLYFV | Wild type |

|              |                                                                                                                                                                                                                                                                                                                                                                                                                                                                                                                                                                                                                                                                                                                                                                                                                                                                                |           |
|--------------|--------------------------------------------------------------------------------------------------------------------------------------------------------------------------------------------------------------------------------------------------------------------------------------------------------------------------------------------------------------------------------------------------------------------------------------------------------------------------------------------------------------------------------------------------------------------------------------------------------------------------------------------------------------------------------------------------------------------------------------------------------------------------------------------------------------------------------------------------------------------------------|-----------|
| <i>MfAgo</i> | MKNLRYKINAYRIKKDYIPKEVYRYRIRSFIEININIYRFVGFYGG<br>VALNQSEFILPYPVENLVLEYDQKDVKLEHIDTLNLEDIENKDK<br>EKAELVRYGYSIYKLPILYKILRDVRESKIINDIRVDPIDFTV<br>KRHNNEYLVDFNHTATVFLKNLWDFVGRDKLKLKLEDYIGKKIIF<br>KPNPKKRYTIKSIEKQNKDIDDIVEHIEYYKWTEEEIKSTFGEI<br>DYTQPIIHCEGIPYFPAPQFCNIVFTMEDLDENTLKDLQSYWRLP<br>NEIKGNIINQIAKKLRFVENEPIELEFIKFNNTPLIVKDENGKPTKI<br>YTTNRLFRWNYDSKSKLYLPYDIPDIKNKTLTTFVLIDENLKNV<br>SGKIKRKYVQMFKNYNKIASKTELPKDFANKWKYFSNNNIRD<br>VIRKIKDEFNEELGFALIIGNRYYENDYYETLKMQLFNLNII SQNI<br>LWENWSKDDNFMNTNLLIQIMGKLGKIFALDAKVNYDYIM<br>GLDSGLGAFKSNRVSGCTVIYDSEGKIRRIQPIDVPSGERIPIHL<br>VVEFLETKT DINMENKNILFLRDGFVQNSEREELKLSKELNSN<br>IEVISIRKNNKYKVFTSDYGIGSIFGNDGIFLPHKTTFGSNPVKLS<br>TWLRFNSGNEEKLKINESIMQLLYDLTKMNYSALYGEGRNLRIP<br>APIHYADKFVKALGKNWKIDEELLKHGFLYFI                                                                                         | Wild type |
| <i>FpAgo</i> | MMLNIFEVDKNRVEVPQDVYLYKVHLKTLEQRKRDMCIAVLR<br>NSFGYLDVNSFVIYSYKEIRDLPRRIKKYCDLEPTGKVKMNEVD<br>ENVRNALVKTFLRSKIRKDIKKLLKKFKKQQSVGRWTVALDL<br>ERIELVEHNGEILVSNVKNLNISSMINLWDIHERDVNRLKGLCWS<br>PENLNDNRIWFRYIPHLIIEEVEDFEESAKSFILSDVHTGEEFFG<br>WTTEDLKKYPENEYGLSEDAIKKIGNYTQFDSTQPIIKGVTWSG<br>KEYPFLPQHCIPAYNPMLATAEEKRIIEIKINLKNKKDEIIRKIE<br>QLPYLKQPDNIEIKKVQETARLRAKFKVVEVTKGKITKTLSPY<br>EKPVSSTLDLFGWISRIIDGGDIIEICIPDYIPENLSRIKEIEAFLLI<br>ENDLNENERKVGDKLLNDAIYVYNFVRSVCLRCGINIPYLYNK<br>GNRFYFENSKEGIRDIYKRITTSLSGEIGFALIFGKRDNYEDEEGE<br>DSFDYYNPLKSALFRNNILSQNFDVTNYVRGDGKINKNTIKYAV<br>SNIIYNIFGKLGKLVKFFVLEEDVPYDYILGIDVGYGEAYTGKVAGC<br>TTVHDSEGRLRNLIPIEKQNYPSKETARIKALLEEIEQKKKIYNID<br>FENKSILIRDGRINKEEINQLMEFSEERNCRITYIEIRKNIVHQFL<br>VNSSQACYVKIGDYYILKAHNPRIGFPRAIKIARKIVIEGDAWRE<br>SSLTEDDILLIYKLTALNYSTIGRDSNLRIPAPIYYADKLVKALKK<br>GWKFDERFLRYGILYFL | Wild type |

**Table S6.** List of nucleic acid sequences for the designed mismatched gDNA directed cleavage on tDNA

| Name            | Sequence (5'-3')                                                        |
|-----------------|-------------------------------------------------------------------------|
| 45nt DNA target | ATATACTATACAACCTACTACCTCGTATAAATTTTAAATAA<br>ATA-FAM                    |
| guide m0        | P-TGAGG <u>T</u> AGTAGGTTGT                                             |
| guide m1        | P- <u>A</u> GAGG <u>T</u> AGTAGGTTGT                                    |
| guide m2        | P-TCAGG <u>T</u> AGTAGGTTGT                                             |
| guide m3        | P-TG <u>T</u> G <u>G</u> TAGTAGGTTGT                                    |
| guide m4        | P-TGAC <u>G</u> TAGTAGGTTGT                                             |
| guide m5        | P-TGAG <u>C</u> TAGTAGGTTGT                                             |
| guide m6        | P-TGAGG <u>A</u> AGTAGGTTGT                                             |
| guide m7        | P-TGAGG <u>T</u> TAGTAGGTTGT                                            |
| guide m8        | P-TGAGG <u>T</u> A <u>C</u> TAGGTTGT                                    |
| guide m9        | P-TGAGG <u>T</u> A <u>G</u> AAGGTTGT                                    |
| guide m10       | P-TGAGG <u>T</u> A <u>G</u> T <u>T</u> G <u>G</u> TTGT                  |
| guide m11       | P-TGAGG <u>T</u> A <u>G</u> T <u>A</u> C <u>G</u> TTGT                  |
| guide m12       | P-TGAGG <u>T</u> A <u>G</u> T <u>A</u> G <u>C</u> TTGT                  |
| guide m13       | P-TGAGG <u>T</u> A <u>G</u> T <u>A</u> G <u>G</u> A <u>T</u> GT         |
| guide m14       | P-TGAGG <u>T</u> A <u>G</u> T <u>A</u> G <u>G</u> T <u>A</u> G <u>T</u> |
